# Supplementary material for: Loss of Migratory Traditions Makes the Endangered Patagonian Huemul Deer a Year-Round Refugee in Its Summer Habitat
Source: MDPI journal article supplement (doi:10.3390/conservation2020023), 2022-05-31
Supplement: s1 [file s1]

## S2: Compendium: Review of Consequences for Ungulates when losing Migratory Traditions

Content:

Implications of having lost migratory traditions

1. Nutritional ecology and seasonal migrations
- 2 Carrying capacity in migratory ungulates using summer and winter ranges
3. Fundamentals of migratory traditions
4. Implications for conservation

### Implications of having lost migratory traditions

Humans have achieved a very sophisticated and temporarily privileged status among mammals. Their capacity to domesticate wild animals for providing them with food, materials, labor, and hedonistic enjoyment, has produced a sustained growth of this forced symbiosis until reaching, as a whole, 97% of the current biomass of mammals in the world (Berger et al., 2020). On a planet with finite resources, this expansive anthropic artifact results in a consequence of the phenomenon, namely the numerical decrease of wild species, their habitats, the loss of culturally transmitted knowledge, and the retraction of animal spatial distributions towards refuge environments.

### 1. Nutritional ecology and seasonal migrations

As early as 1925 the naturalist von Colditz considered the commonly found simple forked antlers in huemul as a sign of some sort of degeneration, since older samples reached up to 5 times per side. Additionally, huemul being prevented from accessing winter areas was suggested to affect huemul health by resulting in malnutrition (Liebermann, 1962). Similarly, in historical times the related *Odocoileus* spp. were largely extirpated from the mesquite savannas range of north-central Texas, where specimens had much superior antler development when compared to remaining extant animals in timbered areas, attributed to a combination of the favorable foraging conditions on historical ranges and low population densities (Wells and Stangl, 2003). As luxury tissue, antler development clearly serves to indicate the nutritional conditions experienced by the male (Bubenik and Bubenik, 1990). Similarly, Liebermann (1962) considered the areas that the huemul were forced to use in winter as inhospitable high elevations and stated that huemul “were pushed there and fatally lost their biological capital before they could adapt”. This was corroborated more recently with at least 88% of dead ( $n=34$ , Flueck and Smith-Flueck, unpubl.) and 86% of live huemul affected with skeletal pathologies, antler asymmetry, and spread over a large geographical region (Flueck and Smith-Flueck, 2008, 2017; Flueck, 2020). All these samples were collected from individuals living year round at high elevations coinciding with old-growth lenga forest habitats (*Nothofagus pumilio*), and representing summer range habitat. These unusual pathological conditions together with the altered spatiotemporal use of habitats further qualify huemul as a refugee species (Flueck and Smith-Flueck, 2006, 2011; Kerley et al., 2012).

The underlying cause of the extant disease pattern relates to the commonly described effect of topography and precipitation on micronutrients, such as leaching occurring on ridge land while adjacent valley soils maintain or increase concentrations (Ren et al., 1987). Extensive areas thus exhibit lower concentrations of minerals in plants at high rather than low altitude (reviewed in Flueck and Smith-Flueck, 2011), as shown in mountain goats (*Oreamnos americanus*) living at higher altitudes having lower levels of essential selenium than elk and deer remaining in lower areas (Fielder, 1986). This was

corroborated in areas with extant huemul where soils from those higher sites had deficient selenium levels, whereas soil levels in low valley bottoms were adequate (Flueck et al., 2014). Areas used by huemul during summer (and also during winter), are generally considered to represent summer ranges based on winter conditions and fertility, such that all livestock producers in these areas remove their animals before winter and move them to winter areas (Gonzalez and Tapia, 2017; Massara Paletto and Buono, 2020). Notably, since colonial times, past and current livestock producers move their animals out of the Protected Park Shoonem before winter, as is the practice in other similar watersheds both in Argentina and Chile, to move them to areas considered appropriate winter ranges (Ladio and Lozada, 2004). Similarly, red deer (*Cervus elaphus*) introduced to former huemul areas remained as residents for several decades before adopting migratory behavior, when they always returned to winter ranges in that season (Flueck and Smith-Flueck, 2011). Congruently, huemul reported in the accompanying paper to be year-round residents in a summer range were deficient in several essential micronutrients based on hair analysis (Flueck, 2020), which explains the prevalent bone disease and low average live span (Flueck, 2015; Flueck and Smith-Flueck, 2008, 2017). The high frequency of asymmetry of antlers and their deformed development in many subpopulations also indicate nutritional problems (Geist, 1998). Besides causing a rare bone disease in huemul, selenium deficiency also affects metabolic and immune systems, such that the unusual reactions reported to caseous lymphadenitis and putative parapoxvirus pathogens may relate to such deficiencies (Flueck, 2020). Bighorn sheep (*Ovis canadensis*) were also shown to have lost traditional seasonal movements by overhunting that resulted in many herds having associated seasonal nutritional deficiencies, and which was considered the ultimate cause of declining herds (Honest and Frost, 1942; Packard, 1946; Leopold et al., 1963; Risenhoover et al., 1988). Moreover, reviewing a global database of large migratory mammalian herbivores, Teitelbaum et al. (2015) found that animals living in resource-poor environments travel farthest to fulfil their resource needs, and also had increased home range sizes. However, this trait only works for certain resources, mainly levels of protein, energy, fibers, and salt. Low phosphorous and/or calcium also is noted and results in chewing of bones. Importantly however, deficiency of many essential trace minerals are not perceived by ruminants, for example copper or selenium deficiencies. Thus, while migratory ungulates may leave a summer range temporarily to access a salt lick on the winter range, trace mineral deficiencies do not elicit a response. Instructively, although many wild ungulate exhibit substantial plasticity regarding to migrate versus to remain resident, or changing migratory paths and localities (Spitz et al., 2018), huemul was the only example of having changed to become residents in typical summer ranges (Xu et al., 2021).

## 2. Carrying capacity in migratory ungulates using summer and winter ranges

Conventionally, habitat carrying capacity for ruminants is based on forage supplies of energy and protein (Van Soest, 1982). In this respect, such type of nutritional constraints for current low-density huemul appear improbable, considering equivalent habitats support high densities of exotic herbivores such as red deer, although the latter also access typical winter ranges (Flueck and Smith-Flueck, 2006). Today, ecotonal ranges formerly used by huemul produce 3000–5000 kg/km<sup>2</sup> of exotic ruminant biomass, equivalent to 40–60 huemul/km<sup>2</sup> if they would forage similarly, as would be expected from mixed feeders (Flueck, 2010). Currently no huemul exist anymore in extra-Andean Argentine Patagonia which supported up to 25 million sheep, 4 million cattle and 0.5 million horses (von Thüngen and Lanari, 2010). Krieg (1940) also suggested that forage, which supported a large quantity of exotic herbivores with superb body development, could not explain the few or absent huemul. However, an evaluation of habitat should be restricted to the limiting nutrients (Van Soest, 1982), which frequently are specific macro- and micronutrients, rather than protein and energy supplies. As Liebermann (1962) al-

ready observed: “everybody familiar with mountains knows that summer and winter ranges are different and separated vertically; with snow fall, huemul must descend, however, it was exactly the lower hill sides and fertile valleys which were settled by men and his livestock. If huemul find lower areas occupied by livestock and people, they need to remain in higher places, where they will suffer from malnutrition with consequences to their offspring, and being weakened they are more prone to disease and easier prey to natural predators”.

### 3. Fundamentals of migratory traditions

In seasonal mountain areas, winter ranges naturally contain year-round residents besides the migratory members that utilize upper elevation summer ranges (Adams, 1982; Peters et al., 2017; Gogan et al., 2019; Koprowski and Krausman, 2019; Xu et al., 2021). Ungulates dispersing or being translocated to winter ranges tend to remain as residents initially (Haller, 2002; Flueck and Smith-Flueck, 2011), and it can take 90 years, or 12 to 13 generations, for half of the descendants of translocated animals to become migratory (Festa-Bianchet, 2018). Moreover, eventually established migratory traditions are rigid enough such that deer may ignore excellent areas (Gogan et al., 2019), traverse them to spend the summer in much inferior habitat at 110 km from their winter range (Flueck, 1989). They may also disregard elevated predation risks besides signals of habitat quality (Sawyer et al., 2019; Flueck and Smith-Flueck, 2011), as shown by traversing several mountain ranges in order to use their traditional winter and summer ranges (Moser, 1962).

Migratory behavior (altitudinal and horizontal) takes generations to evolve and is passed down culturally (Putman and Flueck, 2011; Festa-Bianchet, 2018; Jesmer et al., 2018; Gogan et al., 2019). A seasonally migrating female commonly gives birth to the young in the summer range, and in autumn the young follows the mother to migrate to the winter range, and back to the summer range the following spring, with the animals exhibiting very high fidelity to migratory routes and seasonal ranges (Jakopak et al., 2019; Morrison et al., 2021). Instructively, if a mother dies on the winter range, the young most often remains there accompanying other resident animals (Flueck, 1989; Thirgood, 1995; Via et al., 1995; Avital and Jablonka, 2000; McClure et al., 2005). A winter range rarely is inhabitable during summer such that all animals migrate away, but it occurs on ranges with wet/dry seasons.

The process leading to such partially migratory populations was also evidenced with European red deer introduced to winter ranges formerly used by huemul, where initially they remained all year as residents (Flueck and Smith-Flueck, 2011). After several decades, however, migratory behavior was adopted by some deer, and marked red deer migrated 24 linear kilometers (Flueck, 2005). This was also shown to have occurred with red deer recolonizing the Swiss National Park (Haller, 2002). Instructively, two occasions of reintroductions of huemul corroborate this basic pattern of recolonization behavior among cervids. Huemul were reintroduced to Torres del Paine National Park (Chile) between 1977–1980, with resident groups remaining in valley bottoms, and a subsequent expansion reached into grassland areas where they overlap with guanaco (Rau 2003, Guineo et al. 2008). Similarly, huemul reintroduced in the Los Rios region (Chile) became all-year residents in valley bottoms together with guanaco (F. Vidal unpubl. data).

Among cervids, using summer ranges and also accomplishing short visits during summer to access mineral licks on winter ranges (Brandborg, 1955; Mincher et al., 2008) are cultural migratory behaviors which are transmitted vertically (Adams, 1982; Nelson and Mech, 1999; Festa-Bianchet, 2018; Jesmer et al., 2018). These cultural traits in ungulates can go back 5000 to 6000 years ago (Andersen, 1991; Berger et al., 2006; Lyman, 2006), and are highly immutable (Sawyer et al., 2019). Preserving such cultural traits are considered important, especially for endangered species (Ryan, 2006; Jesmer et al., 2018).

Individuals of various ungulate species have been observed to briefly leave their summer range to make large excursions to winter ranges solely to use a mineral lick for a few hours to a few days, despite the increased risk from predation (reviewed in Flueck and Smith-Flueck, 2011). Many remaining huemul populations are tied year round to refuge areas on summer ranges because the residents on original winter ranges are extinct, and the few extant dispersers getting there are consistently being eliminated (Flueck and Smith-Flueck, 2011). Although a few recent sightings of huemul in ecotonal areas show that some do occasionally disperse from summer-range refuges, they do not establish reproductive populations as they can not survive in valleys settled by humans, inevitably being hunted, or killed by dogs or road traffic (Flueck, 2018). While migration and summer jaunts to mineral licks are learnt behaviors, dispersal is innate, being an emigration of individuals by random diffusion that is predetermined genetically and is not in response to environmental conditions (Howard, 1960). *Odocoileus* had little or no plasticity in terms of whether or where they migrate: resident deer remained residents, and migrant deer remained migrants, regardless of age, reproductive status or number of years monitored (Gogan et al., 2019; Sawyer et al., 2019). However, some individual plasticity does occur which explains the development of new movement patterns including recolonizations (van de Kerk et al., 2021; Xu et al., 2021).

The spacial capacity of migration among *Odocoileus* has been shown to reach distances up to 104 km (Gogan et al. 2019), up to 264 km (Sawyer et al. 2016), and even up to 410 km (Kauffman et al. 2020). This implies that huemul also can migrate substantial distances, and it corroborates the historical accounts referring to migrating huemul.

Therefore, the resident behavior reported for huemul that takes place on a summer range, not a winter range as is the norm for cervids, is an artefact of anthropogenic elimination of the migratory tradition resulting in the extirpation of all huemul in historical winter ranges.

#### 4. Relevant case: a fossil deer suffering from bone pathology

The study of bones from a fossil deer endemic to Crete island revealed many pathological lesions (Lyras et al., 2019), equivalent to those described in huemul (Flueck and Smith-Flueck 2008, 2011, 2017). Lyras et al. (2019) concluded that the fossil deer on this island were affected by severe metabolic bone disease from soil mineral deficiencies and possible overgrazing of the habitat. Similarly, many huemul populations have been described as persisting in artificial "islands" with concomitant bone pathology (Flueck and Smith-Flueck 2011).

#### 5. Implications for conservation

To base management strategies on the extant distribution, when it is an artefact, is erroneous as was shown for bighorn sheep in North America (Honest and Frost, 1942), and ibex (*Capra ibex*) and chamois (*Rupicapra rupicapra*) in Europe (Yockney and Hickling, 2000; Phoca-Cosmetatou, 2004; Baumann et al., 2005). The name "alpine chamois" resulted from historic overhunting which nearly exterminated chamois in low lands, but which survived in Alpine refuges. However, modern translocations resulted in its recovery such that it expanded to forested areas even far from the Alps, such that now it is also recognized as "forest chamois" in areas clearly corroborated by archaeozoology (Baumann et al., 2005). Huemul is another species which has been limited to suboptimal habitat for many decades if not centuries. If in such cases the currently used habitats are identified as the conservation priority areas for the species in question (e.g. Riquelme et al., 2018), without recognizing that these represent a suboptimal portion, this then might present one of the largest risks for such refugee species (Kerley et al., 2012; Faurby and Araujo, 2018; Nüchel et al., 2018). Sedentariness in artificial settings is considered one of the largest problems challenging long-term persistence of bighorn sheep populations

(Risenhoover et al., 1988), and acknowledging historical species ranges is thus important for recovering endangered species (Laliberte and Ripple, 2004; Phoca-Cosmetatou, 2004; Cromsigt et al., 2012; Kerley et al., 2012; Lea et al., 2016; Faurby and Araujo, 2018). Yet, although little knowledge exists about natural movement patterns of South American deer, this is likely to be fundamentally important to maintain viable populations (Grotta-Neto and Duarte, 2019). Whereas natural sink areas are the norm to be surrounding well-performing populations in source areas, there is the need to differentiate the former from an artificial ecological trap, since the latter will drive a local population to extinction (Battin, 2004). Moreover, it is essential that the shifting baseline syndrome be overcome (Soga and Gaston, 2017): repeating old, unfounded and outdated interpretations, like huemul being a “mountain deer”, being short-legged, non-migratory, etc. As shown with published fake information, these get cited many times, over long periods, and even with causing impact on human health (Bar-Ilan and Halevi, 2021).

## References

- Adams AW. 1982. Migration. Pages 301-321 In: (Eds. Thomas, J. W. and D. E. Toweill) Elk of North America. Ecology and Management. Stackpole Books, Harrisburg, PA.
- Andersen R. 1991. Habitat deterioration and the migratory behavior of moose (*Alces alces* L.) in Norway. *J Appl Ecol* 28: 102–8. doi:10.2307/2404117
- Avital, E., Jablonka, E. 2000. Animal traditions. Cambridge Univ. Press, Cambridge, UK. 446 pp.
- Bar-Ilan J, Halevi G. 2021. Retracted articles – the scientific version of fake news. Pages 47-70 In: (Eds. Greifeneder R, Jaffé ME, Newman EJ, and Schwarz N) The Psychology of Fake News: Accepting, Sharing, and Correcting Misinformation. Taylor & Francis Group, New York.
- Battin J. 2004. When good animals love bad habitats: ecological traps and the conservation of animal populations. *Cons. Biol.* 18(6):1482-1491.0
- Baumann M, Babota C, Schibler J. 2005. Native or naturalized? Validating alpine chamois habitat models with archaeozoological data. *Ecological Applications* 15(3):1096-1110.
- Berger J, Steven L, Cain SL, Berger KM. 2006. Connecting the dots: an invariant migration corridor links the Holocene to the present. *Biology Letters* 2(4):528-531.
- Berger J, Wangchuk T, Briceno C, Vila A, Lambert JE. 2020. Disassembled Food Webs and Messy Projections: Modern Ungulate Communities in the Face of Unabating Human Population Growth. *Frontiers in Ecology and Evolution* 8(128):doi: 10.3389/fevo.2020.00128.
- Brandborg SM. 1955. Life history and management of the mountain goat in Idaho. Wildlife Bulletin No. 2. Department of Fish and Game, State of Idaho, Boise, Idaho. 142 pp.
- Bubenik GA, Bubenik AB. 1990. Horns, pronghorns, and antlers. Springer-Verlag: New York.
- Cromsigt JPGM, Kerley GIH, Kowalczyk R. 2012. The difficulty of using species distribution modelling for the conservation of refugee species – the example of European bison. *Diversity and Distributions* 18:1253-1257.
- Faurby S, Araujo MB. 2018. Anthropogenic range contractions bias species climate change forecasts. *Nature Climate Change* 8:252–256.

Festa-Bianchet M. 2018. Learning to migrate. *Science* 361:972-973.

Fielder PC. 1986. Implications of selenium levels in Washington mountain goats, mule deer, and Rocky Mountain elk. *Northwest Sci* 60:15-20.

Flueck, W.T. 1989. The effect of selenium on reproduction of black-tailed deer (*Odocoileus hemionus columbianus*) in Shasta County, California. University of California, Davis, USA.

Flueck WT. 2005. Spatio-temporal movements among red deer males, *Cervus elaphus*, introduced to Patagonia. Pages 330-332 In: (Ed. Pohlmeier, K), XXVIIth Congress of the International Union of Game Biologists, Hannover. DSV-Verlag, Hamburg (GE).

Flueck WT. 2010. Exotic deer in southern Latin America: what do we know about impacts on native deer and on ecosystems? *Biological Invasions* 12:1909-1922.

Flueck WT. 2015. Osteopathology and selenium deficiency co-occurring in a population of endangered Patagonian huemul (*Hippocamelus bisulcus*). *BMC Res Notes* 8:330.

Flueck WT. 2018. Elusive cranial lesions severely afflicting young endangered Patagonian huemul deer. *BMC Research Notes* 11:638.

Flueck WT. 2020. Nutrition as an etiological factor causing diseases in endangered huemul deer. *BMC Research Notes* 13(276):1-12.

Flueck WT, Smith-Flueck JM. 2006. Predicaments of endangered huemul deer, *Hippocamelus bisulcus*, in Argentina: a review. *Europ. J. Wildl. Res.* 52(1):69-80.

Flueck WT, Smith-Flueck JM. 2008. Age-independent osteopathology in skeletons of a south American cervid, the Patagonian huemul (*Hippocamelus bisulcus*). *Journal of Wildlife Diseases* 44(3):636-648.

Flueck WT, Smith-Flueck JM. 2011. Recent advances in the nutritional ecology of the Patagonian huemul: implications for recovery. *Animal Production Science* 51(4):311-326.

Flueck WT, Smith-Flueck JM. 2017. Troubling disease syndrome in endangered live Patagonian huemul deer (*Hippocamelus bisulcus*) from the Protected Park Shoonem: unusually high prevalence of osteopathology. *BioMed Central Research Notes* 10:739.

Flueck WT, Smith-Flueck JM, Mincher BJ, Winkel LHE. 2014. Soil selenium levels corroborate direct evidence of selenium deficiency in endangered Patagonian huemul deer (*Hippocamelus bisulcus*). Pages 52-53 In: (Eds. Ma J, Zhang M, Halbrook R, Liu B, and Zhang W) Proceedings of the 8th International Deer Biology Congress. Northeast Forestry University, Harbin, China.

Geist V. 1998. *Deer of the world*. Stackpole Books, Pennsylvania, USA. 421 pp.

Gogan PJP, Klaver RW, and Olexa EM. 2019. Northern Yellowstone Mule Deer Seasonal Movement, Habitat Selection, and Survival Patterns. *Western North American Naturalist*, 79:403-427.

Gonzalez V, Tapia V. 2017. Manual bovino de carne. *Boletín INIA (Chile)*, 4:1-173.

- Grotta-Neto, F, Duarte, JMB. 2019. Movements of Neotropical Forest Deer: What Do We Know? Pages 95-109 In: (Eds. Reyna-Hurtado R, and Chapman C) Movement Ecology of Neotropical Forest Mammals Focus on Social Animals. Springer Nature, Switzerland.
- Guineo, O, Guineo Garay, R, Garay, G. 2008. Conociendo al huemul de Torres del Paine. La Prensa Austral, Punta Arenas, Chile. 94 pp.
- Haller, H. 2002. Der Rothirsch im Schweizerischen Nationalpark und dessen Umgebung. Eine alpine Population von *Cervus elaphus* zeitlich und räumlich dokumentiert. Nationalpark-Forschung Schweiz 91:1-144.
- Honess RF, Frost NM. 1942. A Wyoming bighorn sheep study. Wyoming Game and Fish Department Bulletin 1:1-127.
- Howard WE. 1960. Innate and environmental dispersal of individual vertebrates. Amer. Midl. Naturalist 63(1):152-161.
- Jakopak RP, LaSharr TN, Dwinnell SPH, Fralick GL, Monteith KL. 2019. Rapid acquisition of memory in a complex landscape by a mule deer. Ecology 100(12):e02854. 10.1002/ecy.2854.
- Jesmer BR, Merkle JA, Goheen JR, Aikens EO, Beck JL, Courtemanch AB, Hurley MA, McWhirter DE, Miyasaki HM, Monteith KL, Kauffman MJ. 2018. Is ungulate migration culturally transmitted? Evidence of social learning from translocated animals. Science 361(6406):1023-1025.
- Kauffman MJ, Copeland HE, Berg J, Bergen S, Cole E, Cuzzocreo M, Dewey S, Fattebert J, Gagnon Gelzer E, Geremia C, Graves T, Hersey K, Hurley M, Kaiser J, Meacham J, Merkle J, Middleton A, Nuñez T, Oates B, Olson D, Olson L, Sawyer H, Schroeder C, Sprague S, Steingisser A, Thonhoff M. 2020. Ungulate migrations of the western United States. Volume 1. U.S. Geological Survey Scientific Investigations Report 2020–5101. 119 pp.
- Kerley GIH, Kowalczyk R, Crooms J. 2012. Conservation implications of the refugee species concept and the European bison: king of the forest or refugee in a marginal habitat? Ecography 35:519-529.
- Koprowski JL, Krausman PR. 2019. International wildlife management: conservation challenges in a changing world. Johns Hopkins University Press, Baltimore, USA. 248 pp.
- Krieg H. 1940. Als Zoologe in Steppen und Wäldern Patagoniens. Bayerischer Landwirtschaftsverlag, Muenchen, Germany. 197 pp.
- Ladio AH, Lozada M. 2004. Summer cattle transhumance and wild edible plant gathering in a Mapuche community of northwestern Patagonia. Human Ecology 32:225-240.
- Laliberte AS, Ripple WJ. 2004. Range contractions of North American carnivores and ungulates. BioScience 54(2):123-138.
- Lea JMD, Kerley GIH, Hrabar H, Barry TJ, Shultz S. 2016. Recognition and management of ecological refugees: A case study of the Cape mountain zebra. Biological Conservation 203:207-215.
- Leopold AS, Cain SA, Cottam C, Gabrielson IN, Kimball TL. 1963. Wildlife Management in the National Parks. American Forests 4:32-35, 61-63.
- Liebermann J. 1962. Sobre la historia natural del huemul. Anales de la Academia Argentina de Geografia 6:157-168.
- Lyman RL. 2006. Paleozoology in the service of conservation biology. Evol Anthropol 15:11–9. doi:10.1002/evan.20083

- Lyras GA, Giannakopoulou A, Lillis T, van der Geer AAE. 2019. Paradise lost: Evidence for a devastating metabolic bone disease in an insular Pleistocene deer. *International Journal of Paleopathology* 24:213-226.
- Massara Paletto V, Buono G. 2020. Métodos de evaluación de pastizales en Patagonia Sur. Buenos Aires: Ediciones INTA, Centro Regional Patagonia. 288 pp.
- McClure MF, Bissonette JA, Conover MR. 2005. Migratory strategies, fawn recruitment, and winter habitat use by urban and rural mule deer (*Odocoileus hemionus*). *Eur J Wildl Res* 51:170-177.
- Mincher, BJ, J Mionczynski, PA Hnilicka, RD Ball, TX Houghton. 2008. Some aspects of geophagia in Wyoming bighorn sheep (*Ovis canadensis*). *E J Wildl Res* 54(2):192-198.
- Morrison TA, Merkle JA, Hopcraft JGC, et al. 2021. Drivers of site fidelity in ungulates. *J Anim Ecol* 90:955-966.
- Moser CA. 1962. The bighorn sheep of Colorado: a review of Colorado's bighorn sheep studies. Technical Publication No. 10. The Colorado Game and Fish Department, Denver, Colorado, USA. Pg. 1-49.
- Nelson ME, Mech LD. 1999. Twenty-year home-range dynamics of a white-tailed deer matriline. *Canadian Journal of Zoology* 77:1128-1135.
- Nüchel J, Bocher PK, Xiao W, Zhu AX, Svenning JC. 2018. Snub-nosed monkeys (*Rhinopithecus*): potential distribution and its implication for conservation. *Biodiversity Conservation* 27:1517-1538.
- Packard FM. 1946. An ecological study of the Bighorn sheep in Rocky Mountain National Park, Colorado. *Journal of Mammalogy* 27(1):3-28.
- Peters W, Hebblewhite M, Mysterud A, Spitz D, Focardi S, Urbano F, et al. 2017. Migration in geographic and ecological space by a large herbivore. *Ecological Monographs* 87:297-320.
- Phoca-Cosmetatou N. 2004. Site function and the 'ibex-site phenomenon': myth or reality? *Oxford Journal of Archaeology* 23(3):217-242.
- Putman R, Flueck WT. 2011. Intraspecific variation in biology and ecology of deer: magnitude and causation. *Animal Production Science* 51(4):277-291.
- Rau, JA. 2003. Crecimiento poblacional de huemules del sur nativos y reintroducidos en la zona austral de Chile. In: Acosta-Jamett G, editor. 4ta Reunión Chileno-Argentina sobre Estrategias de Conservación del Huemul: CONAF and CODEFF, Las Trancas, Chile: pp. 43-45.
- Ren JZ, Zhou ZY, Pan B, Chen W. 1987. Selenium distribution in four grassland classes of China. In: Comb GF, Spallholz JE, Levander OA, Oldfield JE, editors. *Selenium in biology and medicine*. New York: AVI Books: pp. 769-774.
- Riquelme C, Estay SA, López R, Pastore H, Soto-Gamboa M, Corti P. 2018. Protected areas' effectiveness under climate change: a latitudinal distribution projection of an endangered mountain ungulate along the Andes Range. *PeerJ* 6:e5222; DOI 10.7717/peerj.5222
- Risenhoover KL, Bailey JA, Wakelyn LA. 1988. Assessing the Rocky Mountain Bighorn Sheep Management Problem. *Wildlife Society Bulletin* 16(3):346-352.
- Ryan SJ. 2006. The role of culture in conservation planning for small or endangered populations. *Conserv Biol* 20: 1321-4. doi:10.1111/j.1523-1739.2006.00347.x



Sawyer H, Middleton AD, Hayes MM, Kauffman MJ, and Monteith KL. 2016. The extra mile: Ungulate migration distance alters the use of seasonal range and exposure to anthropogenic risk. *Ecosphere* 7(10):e01534. 10.1002/ecs2.1534.

Sawyer H, Merkle JA, Middleton AD, Dwinnell SPH, Monteith KL. 2019. Migratory plasticity is not ubiquitous among large herbivores. *Journal of Animal Ecology* 88:450-460.

Soga M, Gaston KJ. 2018. Shifting baseline syndrome: causes, consequences and implications. *Frontiers in Ecology and the Environment* 16(4):222-230.

Spitz DB, Hebblewhite M, Stephenson TR, German DW. 2018. How plastic is migratory behavior? Quantifying elevational movement in a partially migratory alpine ungulate, the Sierra Nevada bighorn sheep (*Ovis canadensis sierrae*). *Can J Zool* 96:1385-1394.

Teitelbaum CS, Fagan WF, Fleming CH, Dressler G, Calabrese JM, Leimgruber P, Mueller T. 2015. Ecological Letters. *Ecological Letters* 18(6):545-552.

Thirgood SJ. 1995. The effect of sex, season and habitat availability on patterns of habitat use in fallow deer. *J. Zool., Lond.* 235:645-659.

van de Kerk M, Larsen RT, Olson DD, Hersey KR, and McMillan BR. 2021. Variation in movement patterns of mule deer: have we oversimplified migration? *Movement Ecol.* 9, 44.

Van Soest PJ. 1982. *Nutritional Ecology of the Ruminant*. O & B Books, Inc., Corvallis, Oregon, USA. 373 pp.

Via S, Gomulkiewicz R, DeJong G, Scheiner CD, Schlichting SM, Van Tienderen PH. 1995. Adaptive phenotypic plasticity: consensus and controversy. *TREE* 10(5):212-217.

von Colditz R. 1925. *Im Reiche des Kondor*. Paul Parey, Berlin, Germany. 415 pp.

von Thüngen J, Lanari MR. 2010. Profitability of sheep farming and wildlife management in Patagonia. *Pastoralism* 1(2):274-290.

Wells KW, Stangl FB. 2003. Superior size and antler development in populations of white-tailed deer (*Odocoileus virginianus*) from the North Texas rolling plains. *Texas Journal of Science* 55(4):337-346.

Xu W, Barker K, Shawler A, Van Scoyoc A, Smith JA, Mueller T, Sawyer H, Andreozzi C, Bidder OR, Karandikar H, Mumme S, Templin E, Middleton AD. 2021. The plasticity of ungulate migration in a changing world. *Ecology*, in press, doi:10.1002/ECY.3293

Yockney IJ, Hickling GJ. 2000. Distribution and diet of chamois (*Rupicapra rupicapra*) in Westland forests, South Island, New Zealand. *New Zealand Journal of Ecology* 24(1):31-38.
